# Supplementary material
Source: PubMed Central journal article supplement (PMC2752572)
Supplement: 0905696106_0905696106SI.pdf [file 0905696106_0905696106SI.pdf]

# Supporting Information

Meechan et al. 10.1073/pnas.0905696106

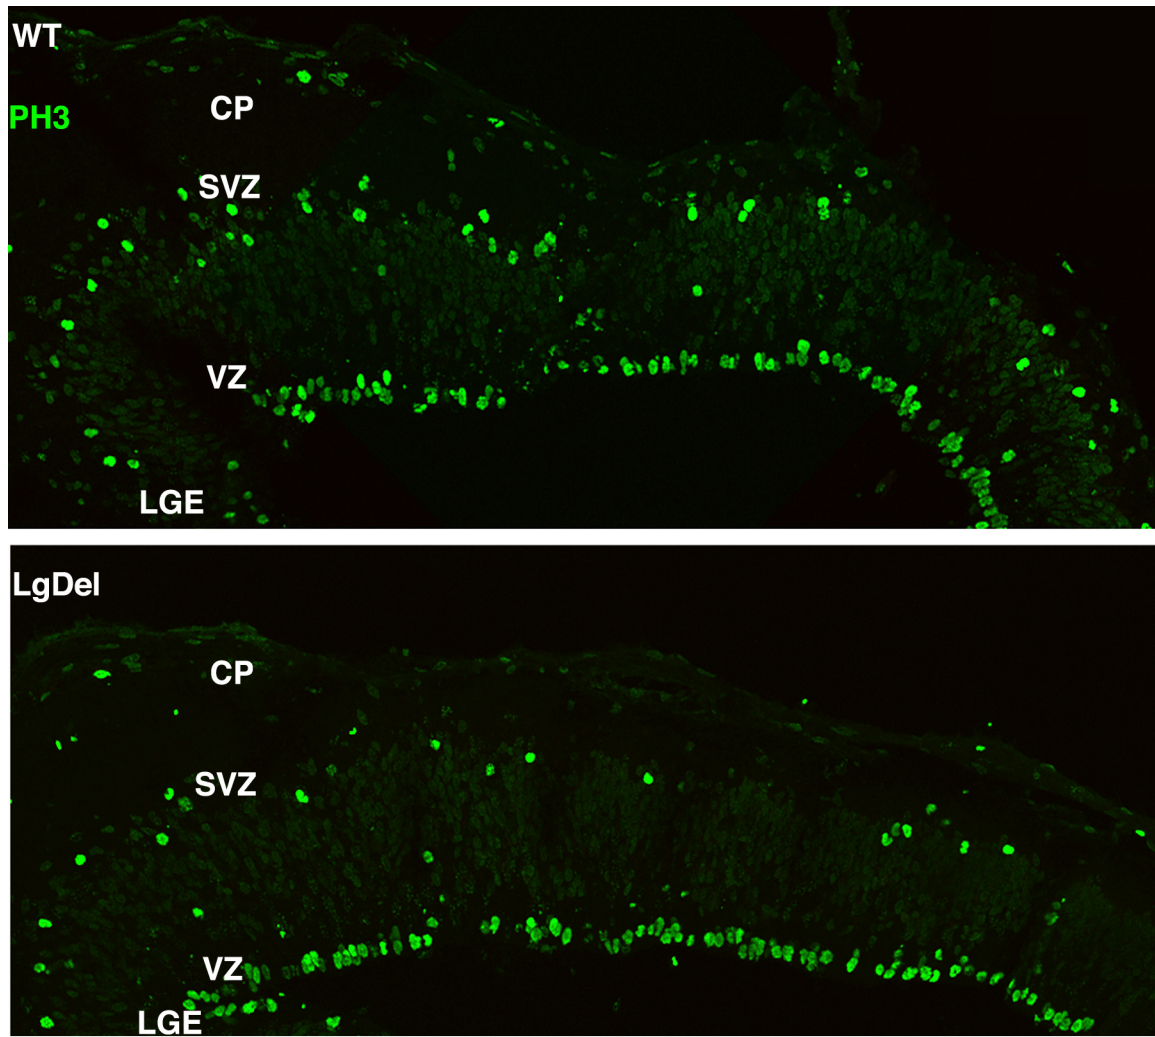

**Fig. S1.** Frequency of PH3 labeled basal progenitors is visibly altered in the LgDel cortex from the corticostriatal boundary (LGE) through the cortical hem (not seen in these images). Montages from E13.5 WT and LgDel littermates are shown here.

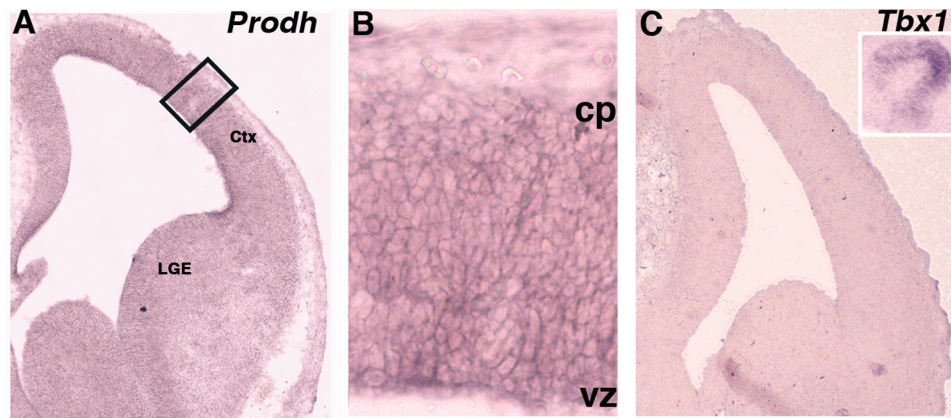

**Fig. S2.** Expression of neither *Prodh* nor *Tbx1* is selectively enhanced in the cortical ventricular zone (VZ)/sub(S)VZ at embryonic day (E)13.5 (A) *Prodh* is expressed uniformly in the cortical neuroepithelium (Ctx). However, there may be some enhancement in the VZ/SVZ of the lateral ganglionic eminence (LGE). (B) Higher magnification of the cortex at region boxed in A shows the uniform distribution of *Prodh* from VZ through cortical plate (CP). (C) *Tbx1* cannot be detected in the E13.5 cortex. However, it is robustly expressed in the dental epithelium of the toothbuds at E13.5 (*Inset*).

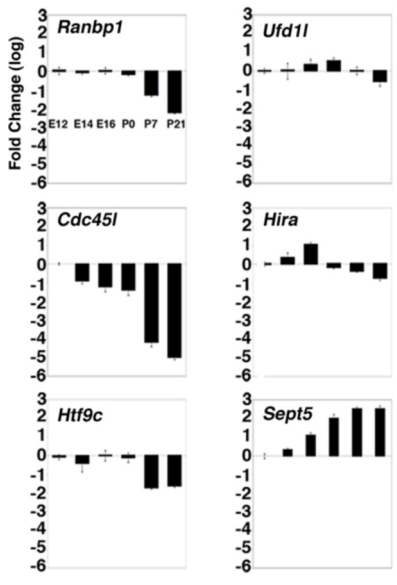

**Fig. S3.** Quantitative PCR (qPCR) measurement of brain expression shows that ventricular zone (VZ)-enhanced 22q11 genes (*Ranbp1*, *Cdc45l*) reach expression maxima during cortical neurogenesis (E12–16) and decline considerably during postnatal life. Genes enhanced in both the VZ and cortical plate (CP) (*Htf9c*, *Ufd1l*), or expressed broadly (*Hira*) have less dramatic temporal variation, and the one CP gene (*Sept5*) increases as neurogenesis ends. For each gene, expression levels are displayed relative to E12.5.

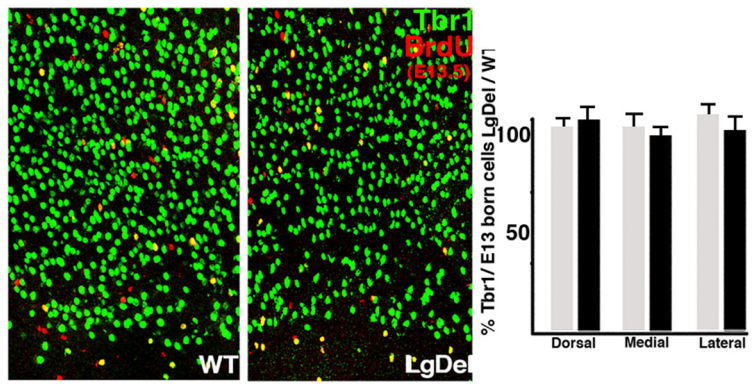

**Fig. S4.** Layer 5/6 neurons in P5 mouse birthdated with BrdU at E13.5 and double-labeled for BrdU and Tbr1 do not differ in frequency between LgDel at WT cortex at P5.

**Table S1. DNA sequences for qPCR primers**

| Gene     | Forward primer       | Reverse primer      |
|----------|----------------------|---------------------|
| Sestrin2 | GGATTATACCTGGGAAGACC | CGCAGTGGATGTAGTTCC  |
| CyclinD1 | GGGCACCTGGATTGTTCT   | CACCGGAGACTCAGAGCA  |
| E2f2     | GCCACCACCTACTACTTCG  | CGGAATTCAGGGACCGTAG |

**Table S2. Antibodies used for immunolabeling of tissue sections**

| Antibody to  | Host species | Concentration | Company                   |
|--------------|--------------|---------------|---------------------------|
| Cux1         | Rabbit       | 1:100         | Santa Cruz Biotechnology  |
| NeuN         | Mouse        | 1:500         | Millipore                 |
| PH3          | Mouse        | 1:200         | Cell Signaling Technology |
| Calbindin    | Rabbit       | 1:2,000       | Swant                     |
| Parvalbumin  | Rabbit       | 1:2,000       | Swant                     |
| Tbr2         | Rabbit       | 1:500         | Abcam                     |
| Cyclin D1    | Mouse        | 1:250         | Santa Cruz Biotechnology  |
| Sestrin 2    | Rabbit       | 1:50          | Protein Tech Group        |
| E2f2         | Mouse        | 1:400         | Santa Cruz Biotechnology  |
| Nestin       | Mouse        | 1:1,000       | Millipore                 |
| Doublecortin | Rabbit       | 1:250         | Cell Signaling Technology |
| BrdU         | Mouse        | 1:100         | BD Biosciences            |
| Tbr1         | Rabbit       | 1:2,500       | Millipore                 |
